# Supplementary material
Source: Springer Nature journal article supplement (https://www.springermedizin.de/resource/supplementary/13601_2011_261_MOESM1_ESM.pdf/9677278)

**A**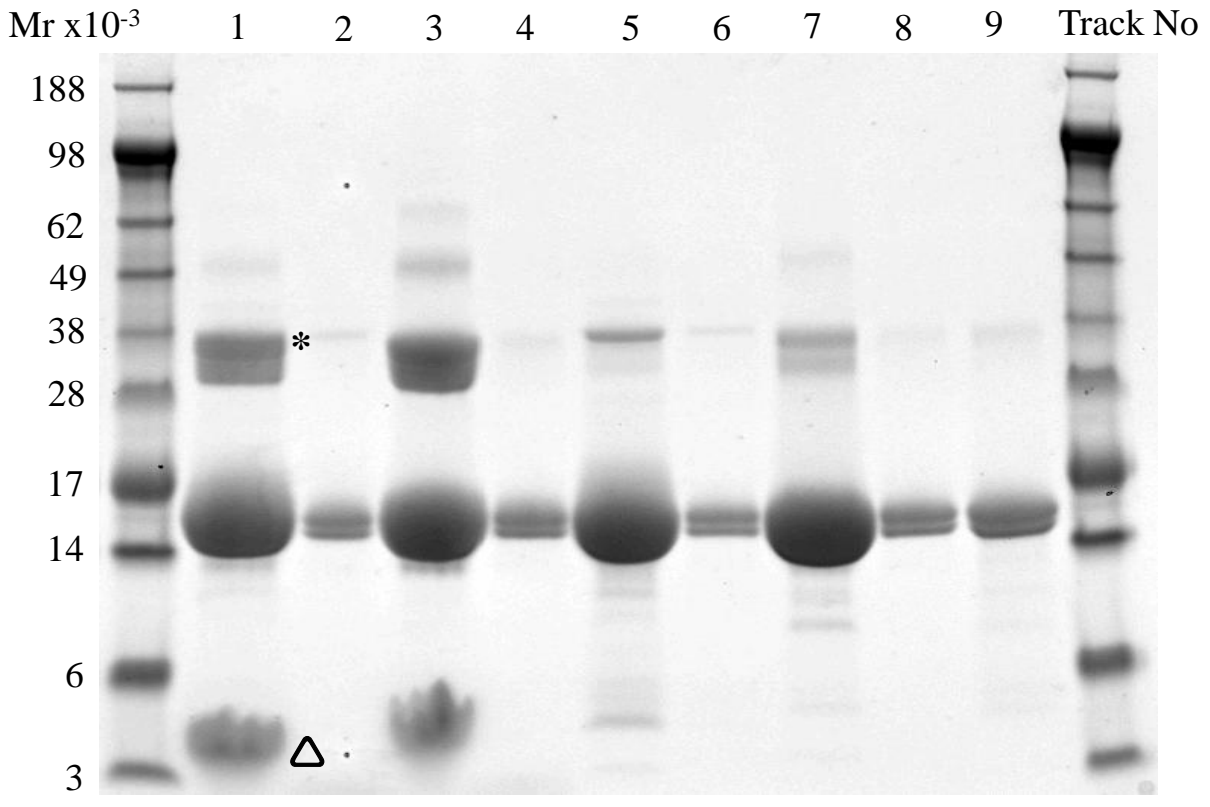**B**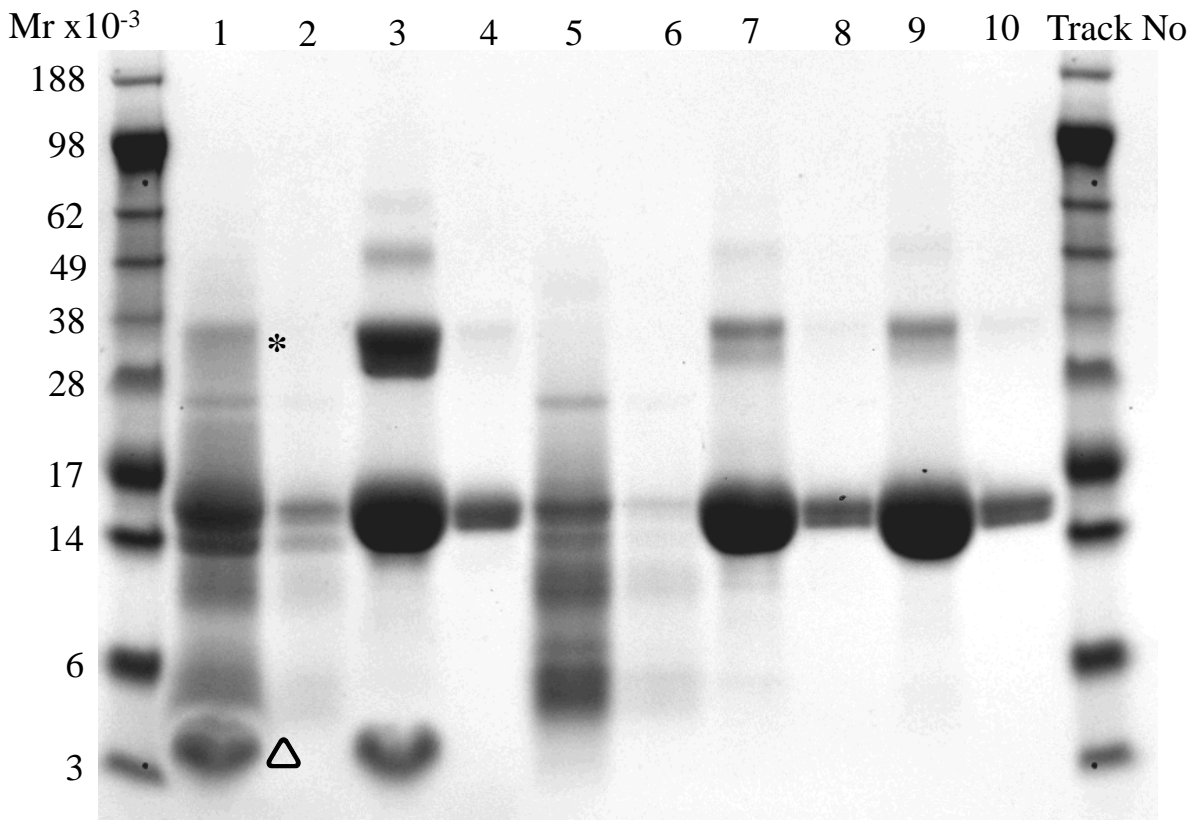

Supplement: MOESM1 [file 9677278]
